# Supplementary material for: Chemiresistive NH3 detection at sub-zero temperatures by polypyrrole- loaded Sn1−xSbxO2 nanocubes
Source: Royal Society of Chemistry journal article supplement (doi:10.1039/d2mh00236a), 2022-01-01
Supplement: d2mh00236a1.pdf [file d2mh00236a1.pdf]

## Supplementary Information

### **Chemiresistive NH<sub>3</sub> detection at sub-zero temperatures by polypyrrole loaded Sn<sub>1-x</sub>Sb<sub>x</sub>O<sub>2</sub> nanocubes**

Nirman Chakraborty and Swastik Mondal\*

*CSIR Central Glass and Ceramic Research Institute, 196, Raja S. C. Mullick Road, Jadavpur, Kolkata-700032, India*

Corresponding author: [swastik\\_mondal@cgcricri.res.in](mailto:swastik_mondal@cgcricri.res.in)

Table 1: Lattice parameters from Le'Bail refinement

|                                |                     |                     |
|--------------------------------|---------------------|---------------------|
| Sample                         | ATO_0.05            | ATO_0.05_PPY        |
| Space group                    | P4 <sub>2</sub> /mm | P4 <sub>2</sub> /mm |
| $a(\text{\AA}), c(\text{\AA})$ | 4.740(2), 3.190(2)  | 4.740(2), 3.189(2)  |
| $\alpha(\text{degrees})$       | 90                  | 90                  |

Table 2: Hall coefficient and carrier mobility values of all samples.

| Sample       | n/p type                                                        |                                                                 | Carrier mobility (m <sup>2</sup> /V.s)                                                                                     |
|--------------|-----------------------------------------------------------------|-----------------------------------------------------------------|----------------------------------------------------------------------------------------------------------------------------|
|              | 200K                                                            | 250K                                                            |                                                                                                                            |
| ATO_0.05     | n type                                                          | n type                                                          | 3.370×10 <sup>-3</sup> (electrons)                                                                                         |
| PPY          | p type                                                          | p type                                                          | 1.51210 <sup>-3</sup> (holes)                                                                                              |
| ATO_0.05_PPY | (p type)<br>Hall<br>coefficient<br>0.00115<br>ΩmT <sup>-1</sup> | (p type)<br>Hall<br>coefficient<br>0.00413<br>ΩmT <sup>-1</sup> | 1.370×10 <sup>-3</sup> (electrons)(~2 times more than ATO_0.05)<br>3.512×10 <sup>-3</sup> (holes) (~2 times more than PPY) |

Table 3: Sensor composition from ICP analysis.

|          |       |
|----------|-------|
| Sample   | Sb:Sn |
| ATO_0.03 | 0.025 |
| ATO_0.05 | 0.048 |

Table 4: Sensor coating details.

|              |                                |
|--------------|--------------------------------|
| Sensor       | Average coating thickness (μm) |
| ATO_0.03_PPY | 32                             |
| ATO_0.05_PPY | 35                             |

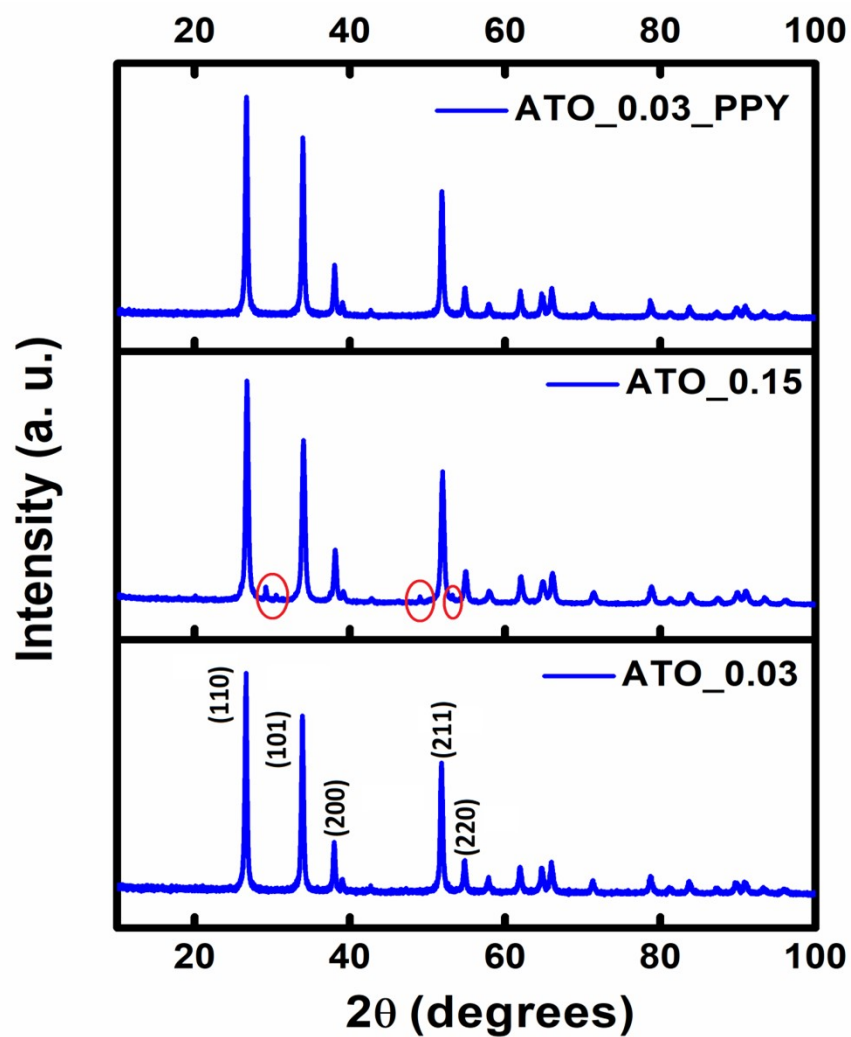

Figure S1: Room temperature powder X-ray diffractograms of antimony doped tin oxide samples (ATO\_0.03 and ATO\_0.15) and polypyrrole loaded antimony doped tin oxide (ATO\_0.03\_PPY) sample. Formation of unwanted phases in ATO\_0.15 has been shown by red circling the peaks related to that phase.

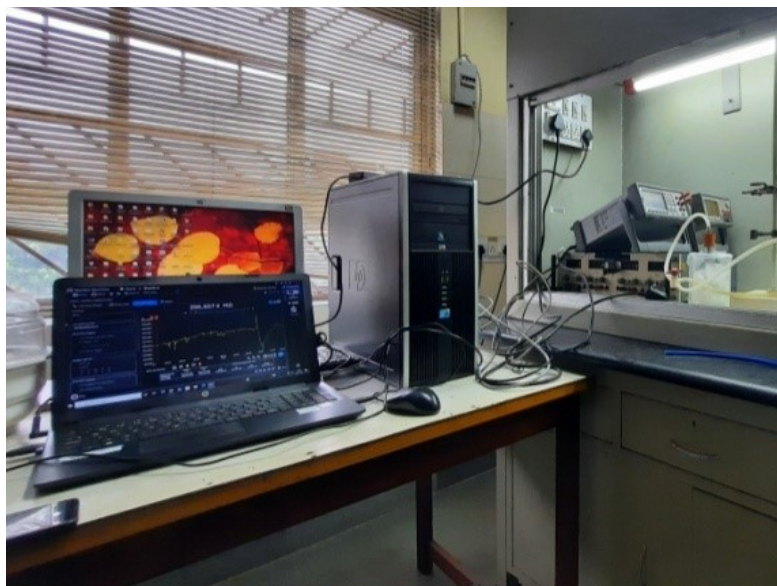

Figure S2: Arrangement for low temperature ammonia sensing.

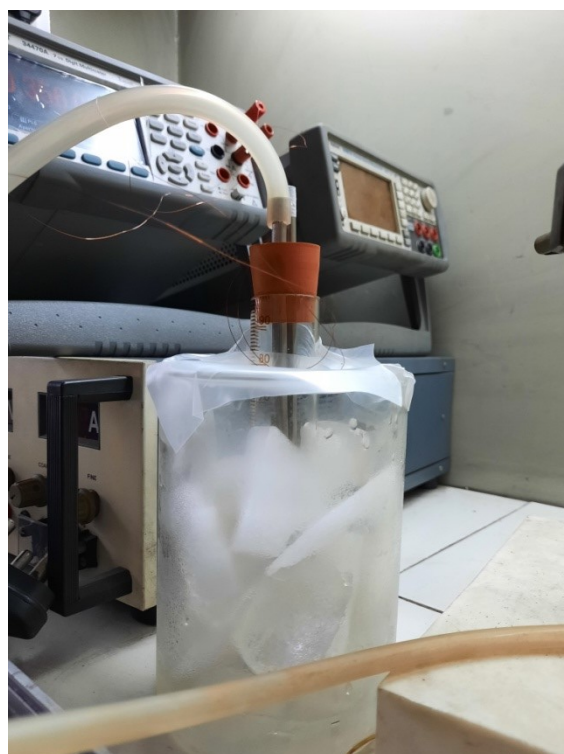

Figure S3: Low temperature enclosure for where the sensor has been placed.

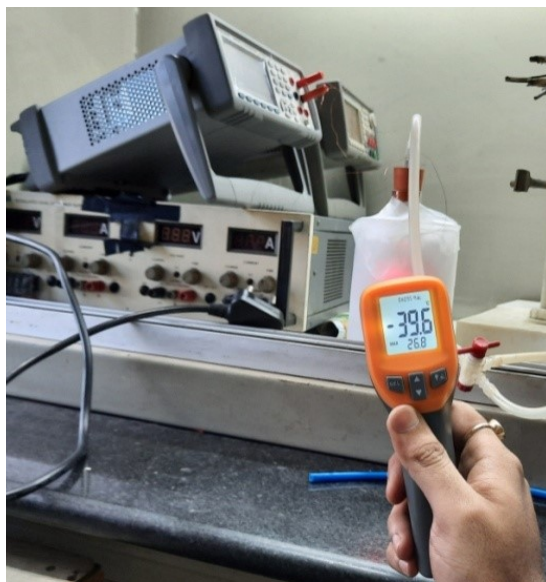

Figure S4: Temperature detection during cooling of sensor enclosure.

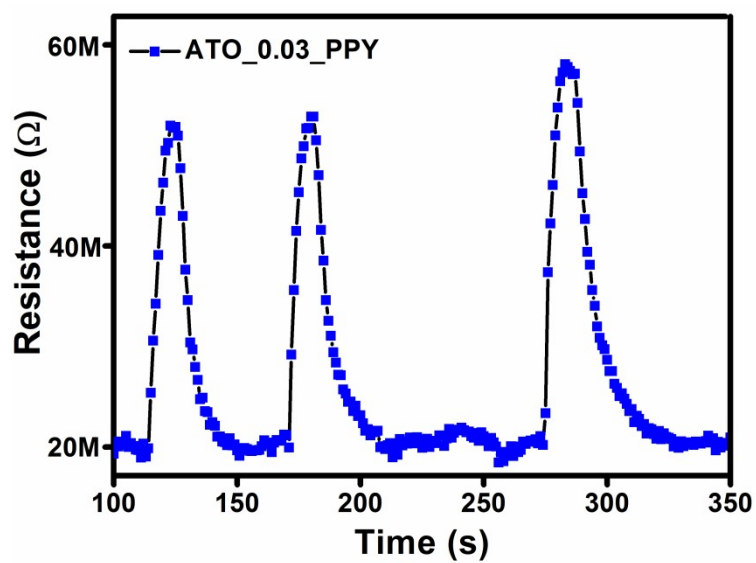

Figure S5: 20 ppm ammonia sensing responses of ATO\_0.03\_PPY sample at -21°C.

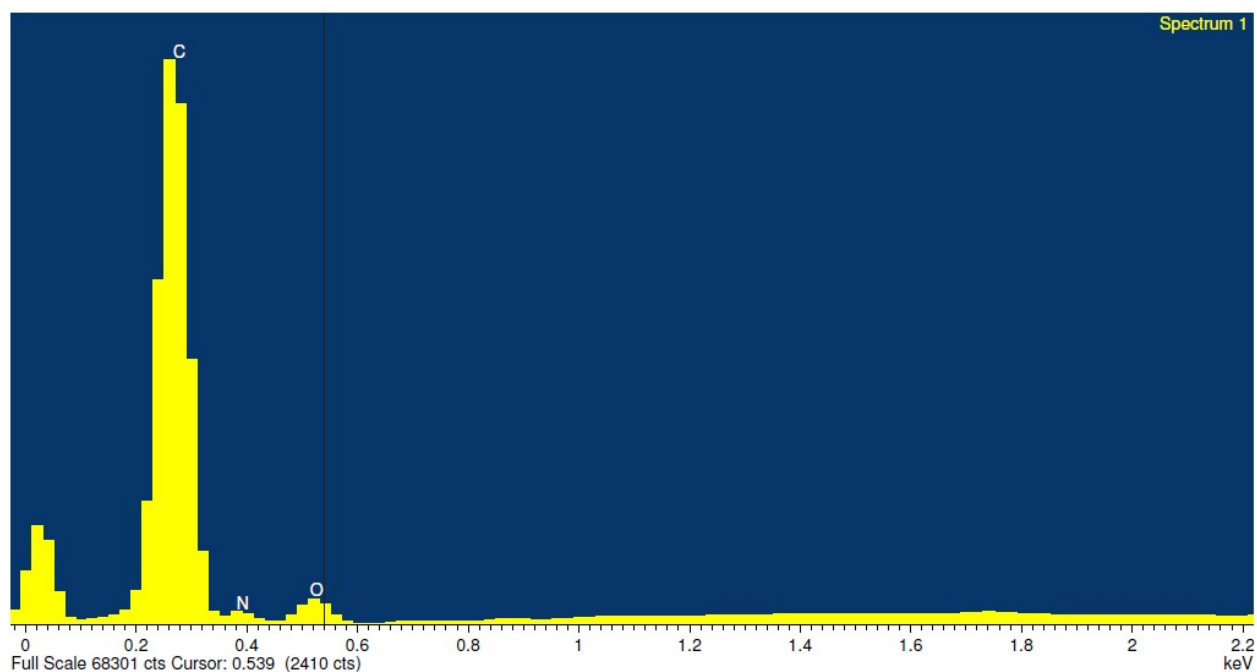

Figure S6: Surface EDX spectrum of polypyrrole (PPY) sample.

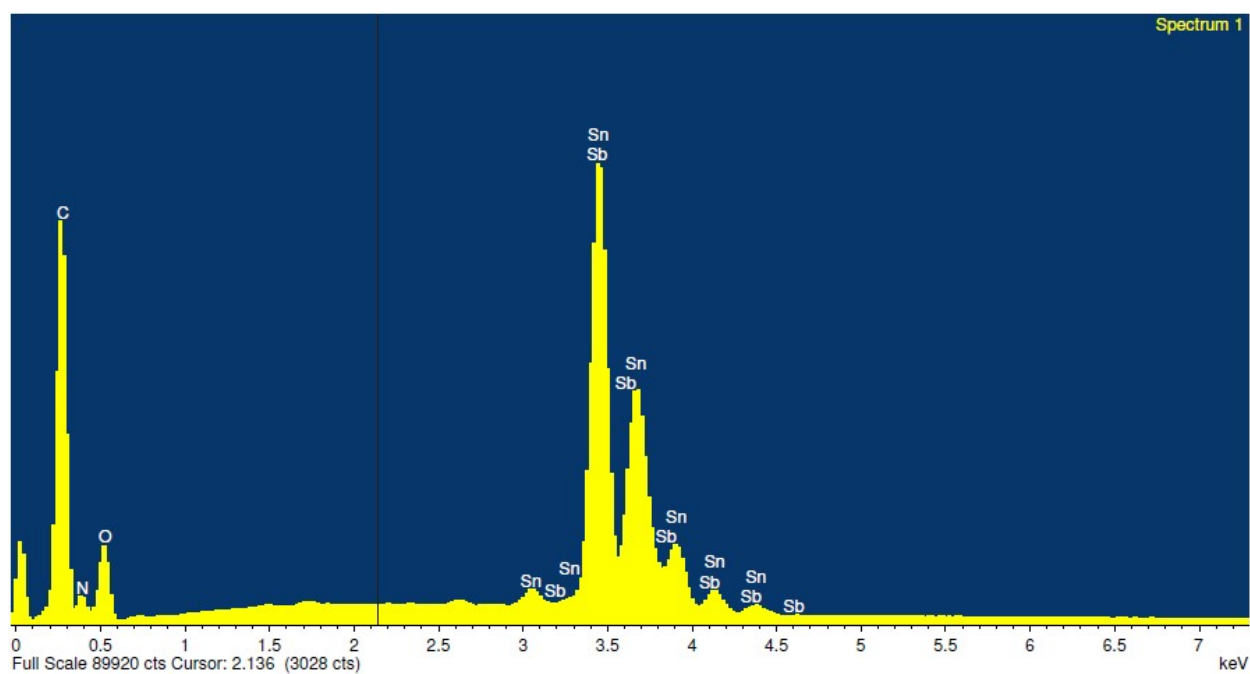

Figure S7: Surface EDX spectrum of polypyrrole loaded antimony doped tin oxide (ATO\_0.05\_PPY) sample.

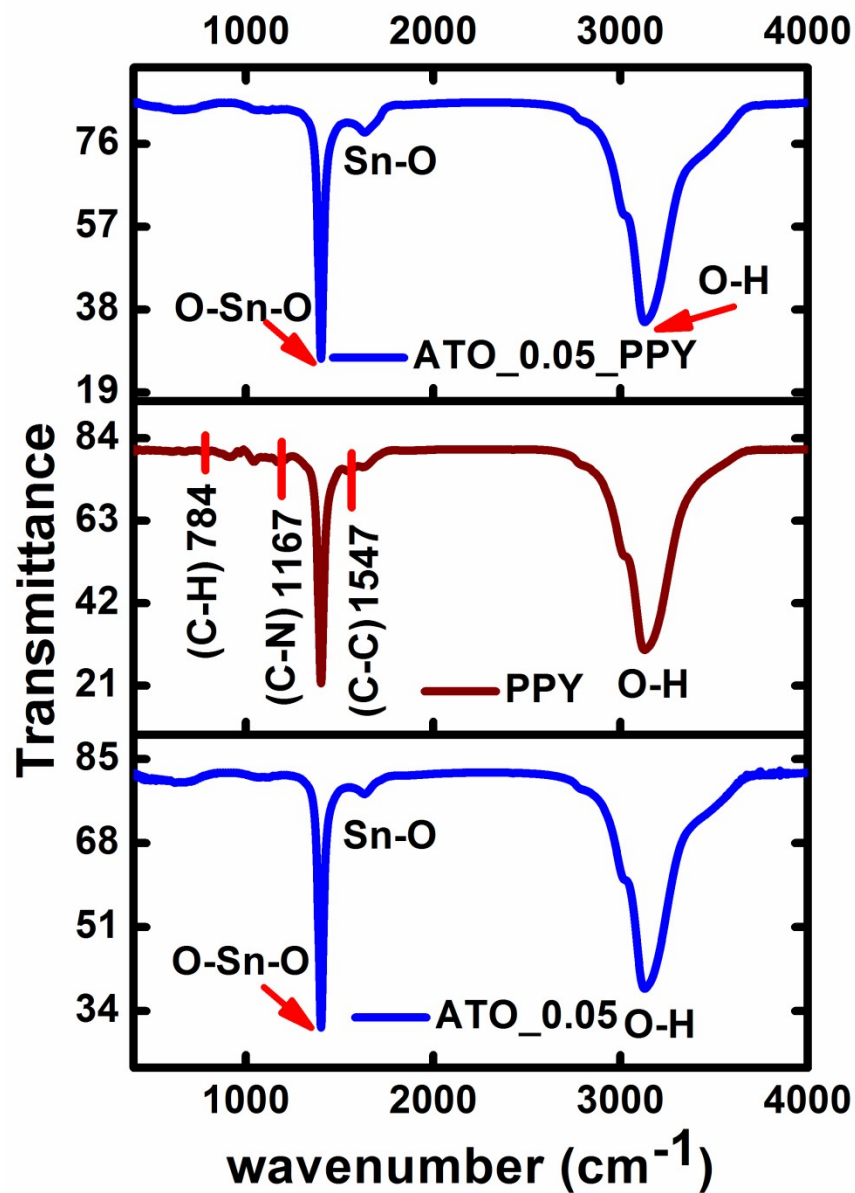

Figure S8: Room temperature FTIR spectra of antimony doped tin oxide (ATO\_0.05), polypyrrole (PPY) and polypyrrole loaded antimony doped tin oxide (ATO\_0.05\_PPY) samples.

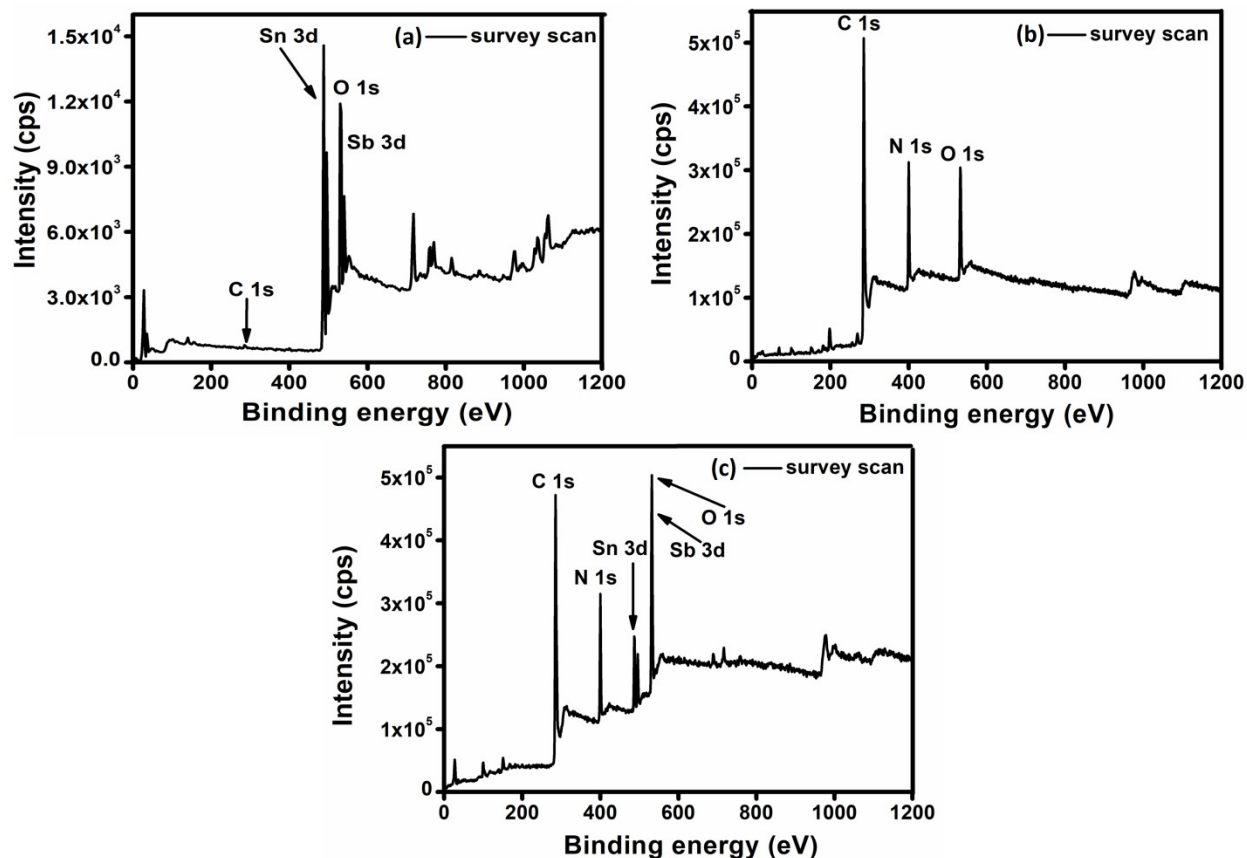

Figure S9: XPS survey scan of (a) antimony doped tin oxide (ATO\_0.05) (b) polypyrrole (PPY) and (c) polypyrrole loaded antimony doped tin oxide (ATO\_0.05\_PPY) samples respectively.

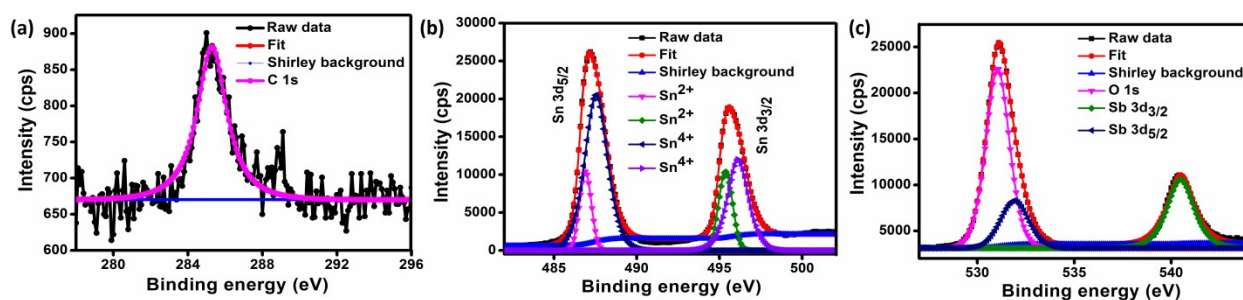

Figure S10: XPS core level (a) C 1s (b) Sn 3d (c) O 1s and Sb 3d spectra of antimony doped tin oxide (ATO\_0.05) sample.

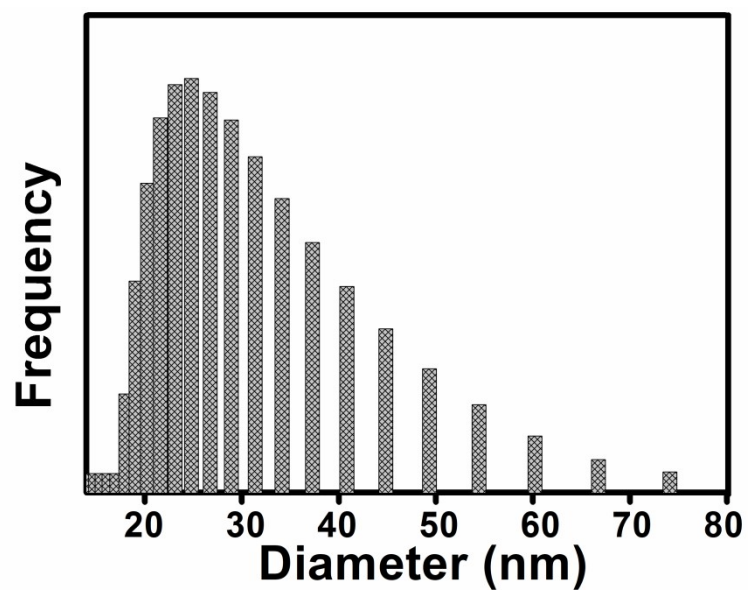

Figure S11: DLS pattern of antimony doped tin oxide (ATO\_0.05) sample.

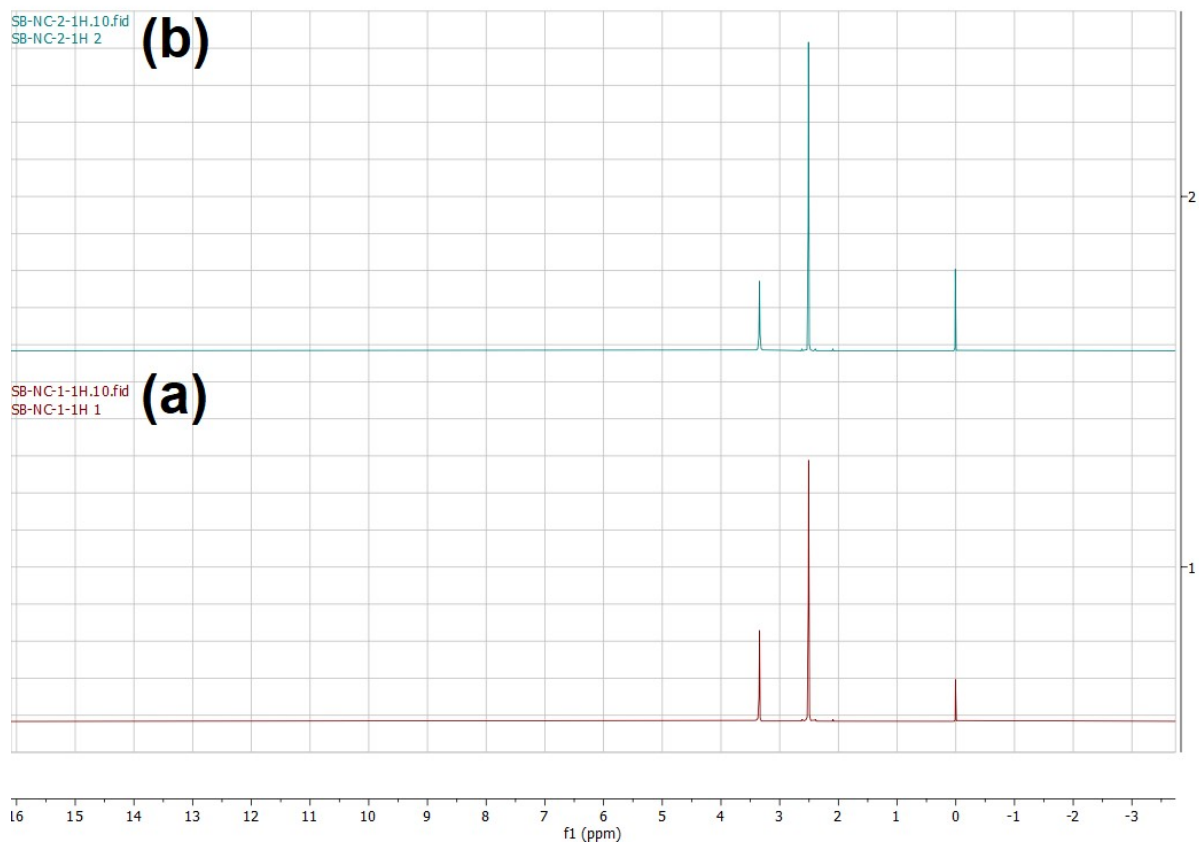

Figure S12: NMR spectra of (a) polypyrrole sample (PPY) and (b) polypyrrole loaded antimony doped tin oxide (ATO\_0.05\_PPY) sample.

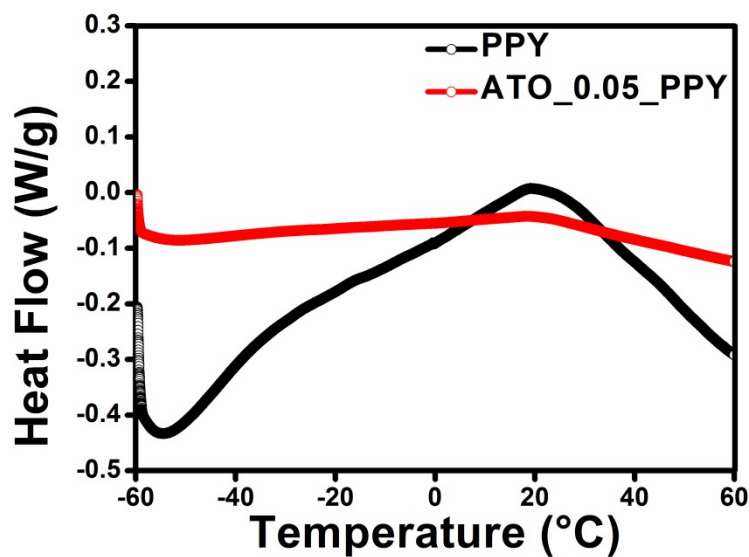

Figure S13: Low temperature DSC curves of polypyrrole (PPY) and polypyrrole loaded antimony doped tin oxide (ATO\_0.05\_PPY) samples.

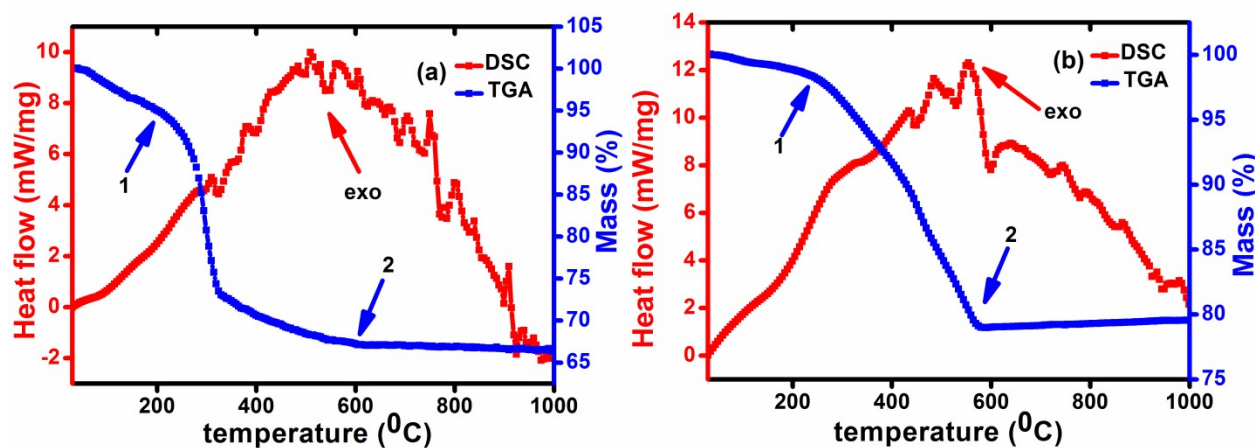

Figure S14: Simultaneous TGA and DSC plots (room temperature to 1000°C) of (a) polypyrrole (PPY) [“1” represents onset of polymer decomposition and “2” represents formation of decomposition products] and (b) polypyrrole loaded antimony doped tin oxide (ATO\_0.05\_PPY) [“1” represents onset of polymer decomposition and “2” represents pure ATO\_0.05 sample with no polymeric remains] in air medium.

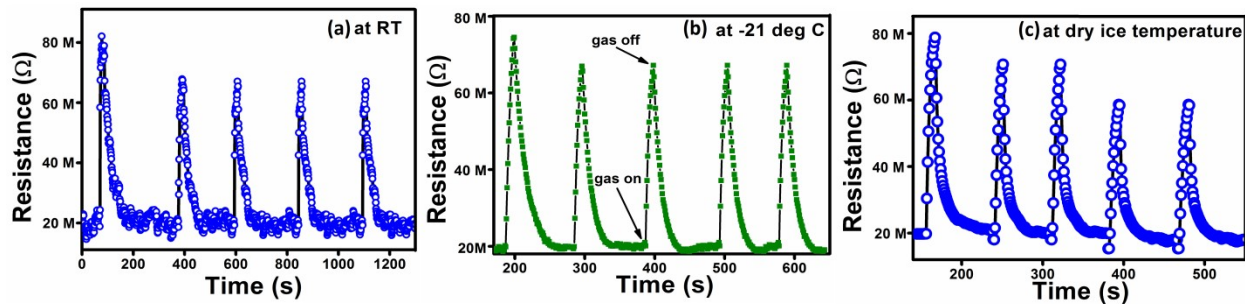

Figure S15: Dynamic sensing response curves (showing repeatability upto 5 cycles) of ATO\_0.05\_PPY sensor at different temperature to 20 ppm ammonia gas. The best results have been achieved for sensing at -21°C.

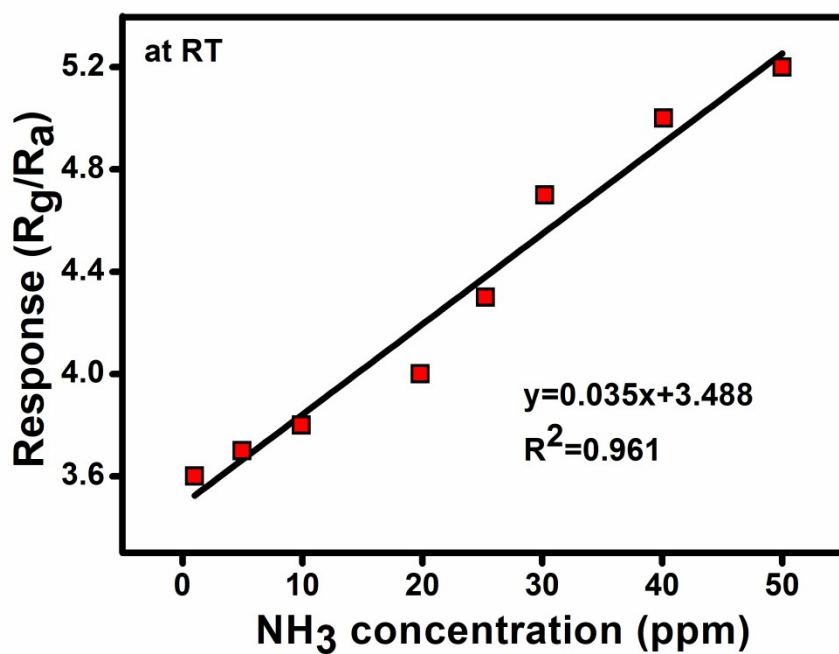

Figure S16: Sensing response vs. ammonia concentration calibration curve for ATO\_0.05\_PPY sensor at room temperature. The curve shows linear correlation upto 50 ppm ammonia at room temperature.

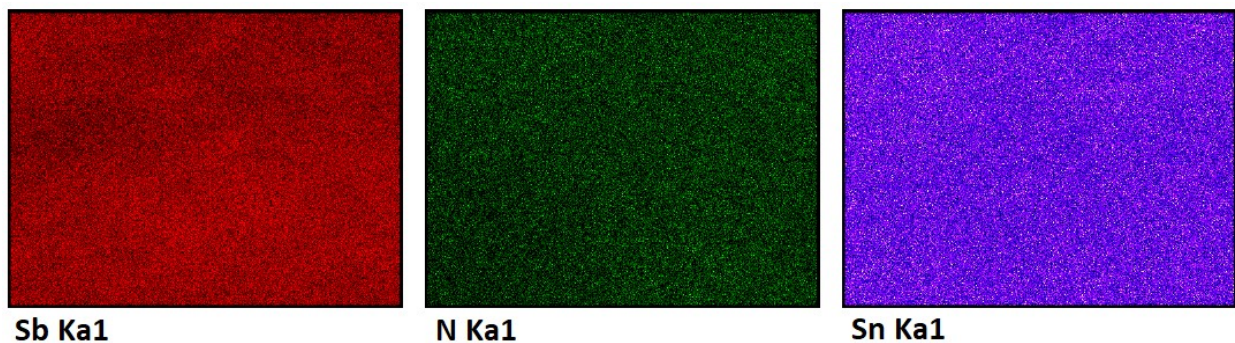

Figure S17: FESEM color mapping of ATO\_0.05\_PPY sample highlighting distribution of Sn, Sb and N (in an area of  $3.43 \times 2.57 \mu\text{m}^2$ ). Elemental mapping is conducted on pellets formed out of powder samples. Sb is shown in red color (black represents other elements). N is shown in green color and Sn is shown in purple color.

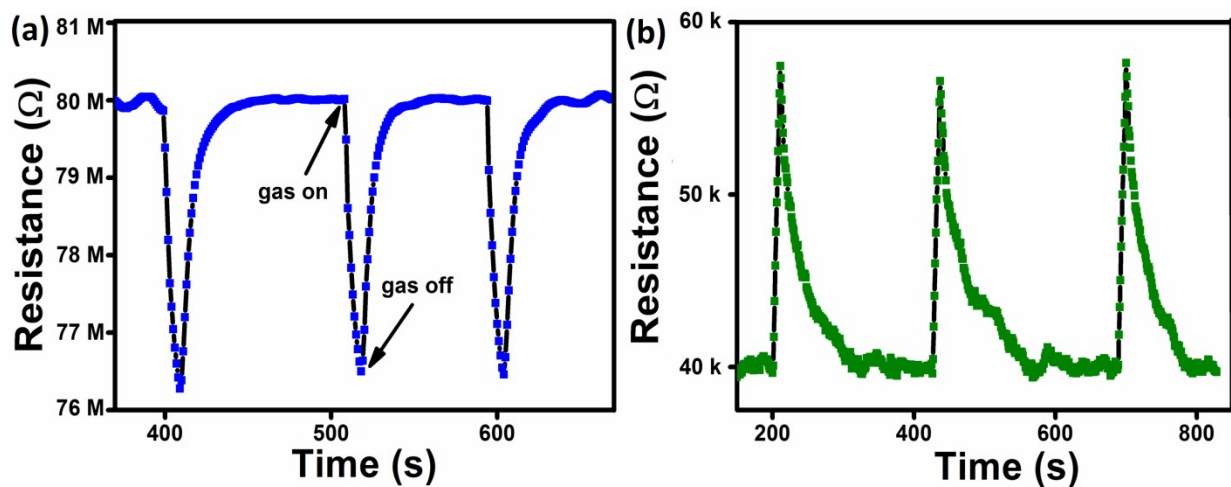

Figure S18: Dynamic sensing responses to 20 ppm ammonia at room temperature by (a) ATO\_0.05 sensor (b) PPY based sensor.

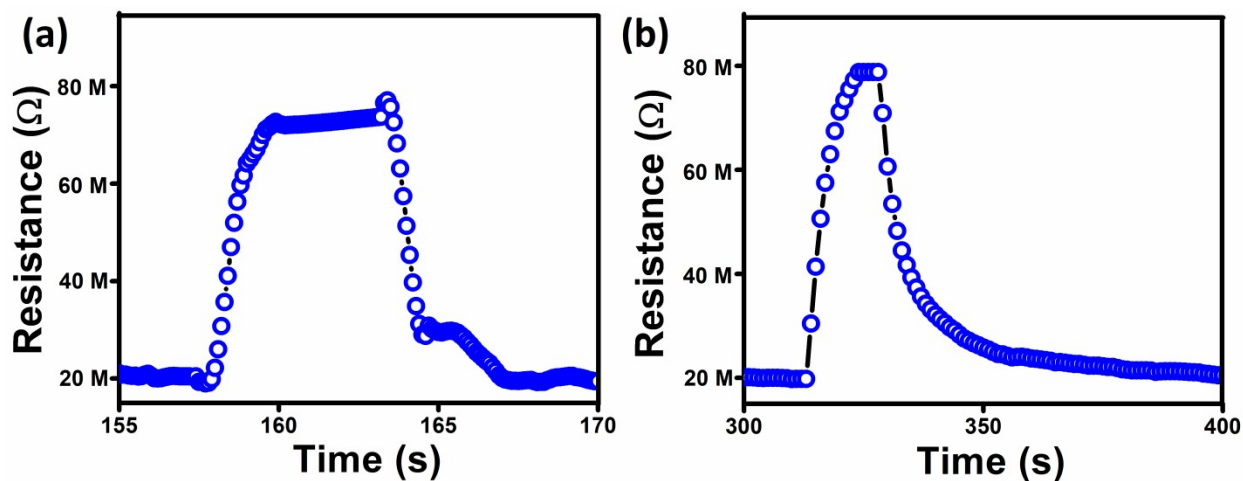

Figure S19: Dynamic sensing responses of ATO\_0.05\_PPY sensor at (a) room temperature (b) - 78°C showing saturation.

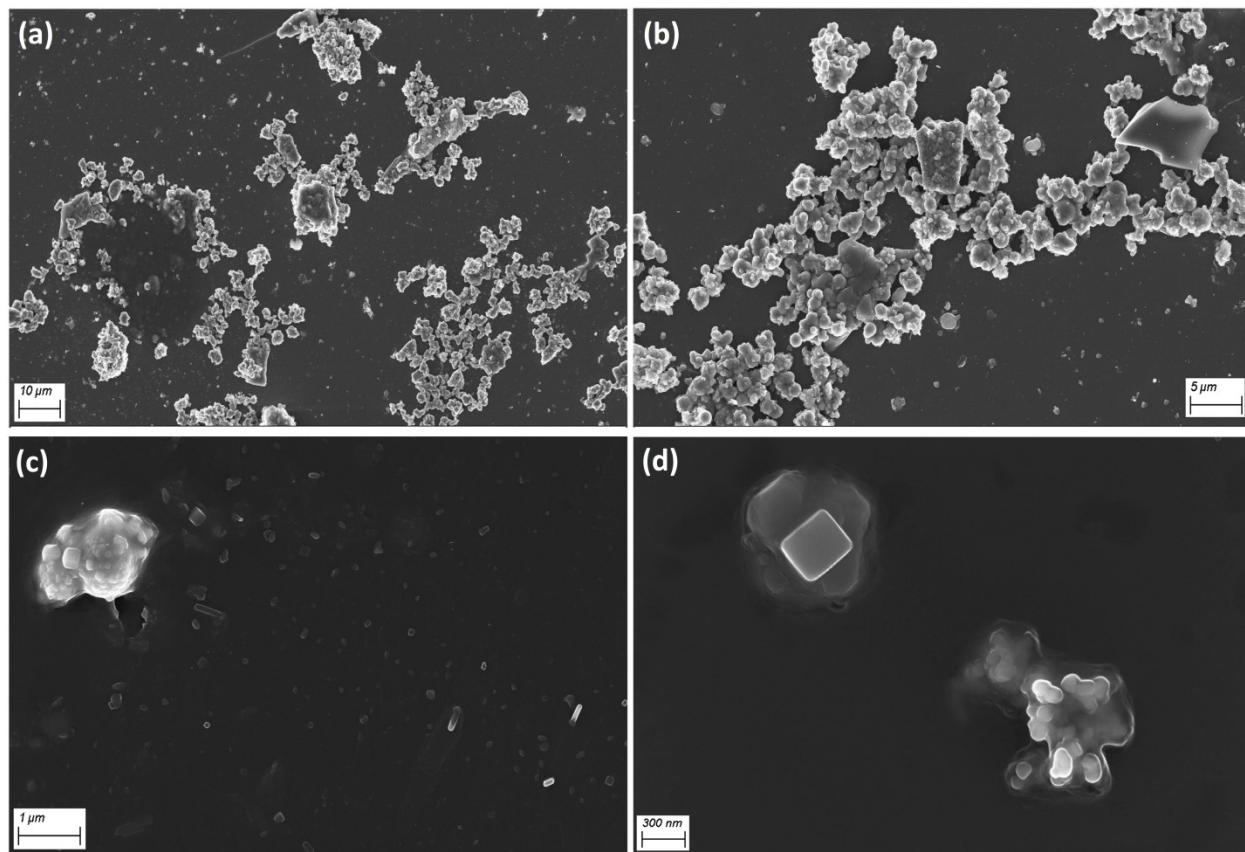

Figure S20: (a-d) FESEM images depicting distribution of Sb doped SnO<sub>2</sub> nanocubes and PPY network in ATO\_0.05\_PPY sample.
